# Supplementary material for: Association between Thyroid Function and Ocular Parameters
Source: MDPI journal article supplement (doi:10.3390/biology11121847), 2022-12-18
Supplement: s1 [file s1]

### Correlation of optical parameters with TSH, thyroid hormones, Tg, TgAb and TPOAb levels

Before analysis, TSH levels were log-transformed (since TSH distribution was right-skewed, following an approximately log-normal distribution). Several optical parameters correlated with TSH, thyroid hormones, Tg, TgAb and TPOAb levels. However, after the Bonferroni correction for multiple comparisons, only the associations presented in **Table S1** remained significant.

**Table S1.** Correlation of optical parameters with TSH, thyroid hormones, Tg, TgAb and TPOAb levels.

|                                       | TSH                      | fT4                                | Tg                       | TgAb                     | TPOAb                     |
|---------------------------------------|--------------------------|------------------------------------|--------------------------|--------------------------|---------------------------|
| Spherical power of left eye           | $r_s = -0.05, p = 0.002$ |                                    | $r = 0.06, p = 0.001$    | $r_s = 0.101, p < 0.001$ | $r_s = 0.081, p < 0.001$  |
| Spherical power of right eye          |                          |                                    | $r = 0.06, p < 0.001$    | $r_s = 0.009, p < 0.001$ | $r_s = 0.085, p < 0.001$  |
| Cylinder power of left eye            | $r_s = -0.05, p = 0.002$ |                                    |                          | $r_s = 0.115, p < 0.001$ | $r_s = 0.102, p < 0.001$  |
| Cylinder power of right eye           |                          |                                    |                          | $r_s = 0.110, p < 0.001$ | $r_s = 0.089, p < 0.001$  |
| IOL of left eye                       |                          | $r = -0.05, p = 0.002$             |                          |                          |                           |
| IOL of right eye                      |                          | $r = -0.067, p < 0.001$            | $r_s = 0.057, p = 0.001$ |                          |                           |
| Posterior chamber length of right eye |                          | $r = -0.08, p = 0.002$<br>(in men) |                          |                          |                           |
| Lens thickness of right eye           |                          |                                    |                          |                          | $r_s = -0.053, p = 0.001$ |

fT4, free thyroxine; IOL, intraocular lens power; Tg, thyroglobulin; TgAb, thyroglobulin antibodies; TPOAb, thyroid peroxidase antibodies; TSH, thyroid-stimulating hormone.  $*p \leq 0.002$ .

**Table S2.** Analysed optical parameters, as well as demographic data and biochemical measurements across the thyroid function groups.

| Variable                                              | Euthyroid                       | Euthyroid with positive antibodies <sup>a</sup> | Subclinical hypothyroid <sup>b</sup> | Clinical hypothyroid <sup>c</sup> | Subclinical and clinical hyperthyroid <sup>d</sup> | p-value                                                                                  |
|-------------------------------------------------------|---------------------------------|-------------------------------------------------|--------------------------------------|-----------------------------------|----------------------------------------------------|------------------------------------------------------------------------------------------|
| Age<br>[n]                                            | 54<br>(42 – 65)<br>[2912]       | 55<br>(44 – 66)<br>[750]                        | 53<br>(35 – 65)<br>[314]             | 57<br>(44 – 66)<br>[127]          | 63<br>(40 – 71)<br>[46]                            | 0.523 <sup>a</sup> , 0.077 <sup>b</sup> ,<br>0.210 <sup>c</sup> , 0.094 <sup>d</sup>     |
| TSH (mIU/l)<br>[n]                                    | 1.5<br>(1.1 – 2.1)<br>[2918]    | 1.7<br>(1.2 – 2.4)<br>[752]                     | 4.2<br>(3.9 – 5.3)<br>[314]          | 5.8<br>(4.2 – 8.5)<br>[127]       | 0.08<br>(0.03 – 0.19)<br>[47]                      | <0.001 <sup>a</sup> , <0.001 <sup>b</sup> ,<br><0.001 <sup>c</sup> , <0.001 <sup>d</sup> |
| fT4 (pmol/l)<br>[n]                                   | 13.1<br>(12.1 – 14.2)<br>[2918] | 13<br>(12.1 – 14.2)<br>[752]                    | 11.9<br>(10.9 – 13.1)<br>[314]       | 9.9<br>(8.9 – 10.1)<br>[127]      | 17.1<br>(13.1 – 19.2)<br>[47]                      | 0.194 <sup>a</sup> , <0.001 <sup>b</sup> ,<br><0.001 <sup>c</sup> , <0.001 <sup>d</sup>  |
| fT3 (pmol/l)<br>[n]                                   | 4.4<br>(4.3 – 4.8)<br>[2918]    | 4.4<br>(4.2 – 4.8)<br>[752]                     | 4.3<br>(3.9 – 4.7)<br>[311]          | 3.7<br>(3.2 – 3.9)<br>[127]       | 5.7<br>(4.5 – 6.2)<br>[46]                         | 0.651 <sup>a</sup> , <0.001 <sup>b</sup> ,<br><0.001 <sup>c</sup> , <0.001 <sup>d</sup>  |
| Tg (ng/ml)<br>[n]                                     | 10.1<br>(6 – 16.7)<br>[2317]    | 9.2<br>(3.3 – 16.9)<br>[589]                    | 10.6<br>(5.3 – 16.9)<br>[272]        | 11.9<br>(7 – 22.1)<br>[97]        | 11<br>(6.1 – 24.2)<br>[36]                         | 0.145 <sup>a</sup> , 0.122 <sup>b</sup> ,<br>0.013 <sup>c</sup> , 0.130 <sup>d</sup>     |
| TgAb (IU/ml)<br>[n]                                   | 6.7<br>(5 – 11.5)<br>[2917]     | 101<br>(17.8 – 157)<br>[751]                    | 12.1<br>(5 – 101)<br>[312]           | 26.5<br>(7.2 – 211.5)<br>[125]    | 10.5<br>(5.1 – 110)<br>[47]                        | <0.001 <sup>a</sup> , <0.001 <sup>b</sup> ,<br><0.001 <sup>c</sup> , 0.002 <sup>d</sup>  |
| TPOAb (IU/ml)<br>[n]                                  | 2.8<br>(1.3 – 6.5)<br>[2908]    | 39.3<br>(20.1 – 115)<br>[750]                   | 9.4<br>(2.3 – 82.7)<br>[313]         | 17.3<br>(3.9 – 153.3)<br>[126]    | 9.9<br>(1.9 – 37.9)<br>[47]                        | <0.001 <sup>a</sup> , <0.001 <sup>b</sup> ,<br><0.001 <sup>c</sup> , 0.004 <sup>d</sup>  |
| Right eye: posterior<br>chamber length<br>(mm)<br>[n] | 15.8<br>(15.2 – 16.5)<br>[2514] | 15.8<br>(15.2 – 16.4)<br>[653]                  | 15.8<br>(15.2 – 16.5)<br>[270]       | 15.5<br>(14.8 – 16.3)<br>[107]    | 16<br>(15.3 – 16.9)<br>[39]                        | 0.549 <sup>a</sup> , 0.767 <sup>b</sup> ,<br>0.023 <sup>c</sup> , 0.447 <sup>d</sup>     |

|                                                |                                  |                                     |                                 |                                     |                                    |                                                                                       |
|------------------------------------------------|----------------------------------|-------------------------------------|---------------------------------|-------------------------------------|------------------------------------|---------------------------------------------------------------------------------------|
| Right eye: axial length (mm)<br>[n]            | 23.1 ± 1.4<br>[2514]             | 23 ± 1.1<br>[653]                   | 23.2 ± 1.2<br>[270]             | 22.9 ± 1.1<br>[107]                 | 23.1 ± 1.6<br>[39]                 | 0.097 <sup>a</sup> , 0.735 <sup>b</sup> ,<br>0.065 <sup>c</sup> , 0.832 <sup>d</sup>  |
| Right eye: IOL (D)<br>[n]                      | 21.5<br>(19.8 – 23.1)<br>[2483]  | 21.5<br>(20.2 – 22.9)<br>[648]      | 21.3<br>(20.3– 22.8)<br>[269]   | 22.4<br>(20.8 – 24)<br>[106]        | 21.9<br>(20.1 – 23.9)<br>[38]      | 0.558 <sup>a</sup> , 0.201 <sup>b</sup> ,<br>0.005 <sup>c</sup> , 0.755 <sup>d</sup>  |
| Right eye: corneal thickness (μm)<br>[n]       | 559.9 ± 36.5<br>[2504]           | 559.7 ± 35.3<br>[655]               | 559.3 ± 36.6<br>[269]           | 558.6 ± 39.1<br>[107]               | 577.3 ± 36.1<br>[39]               | 0.917 <sup>a</sup> , 0.810 <sup>b</sup> ,<br>0.719 <sup>c</sup> , 0.003 <sup>d</sup>  |
| Right eye: lens thickness (mm)<br>[n]          | 4.4 ± 0.5<br>[2495]              | 4.4 ± 0.4<br>[649]                  | 4.4 ± 0.5<br>[267]              | 4.4 ± 0.4<br>[107]                  | 4.3 ± 0.5<br>[38]                  | 0.150 <sup>a</sup> , 0.122 <sup>b</sup> ,<br>0.978 <sup>c</sup> , 0.127 <sup>d</sup>  |
| Right eye: cylinder power (°)<br>[n]           | -0.323 ± 0.920<br>[2491]         | -0.265 ± 0.885<br>[651]             | -0.286 ± 0.865<br>[273]         | -0.315 ± 0.913<br>[106]             | -0.597 ± 1.262<br>[40]             | 0.146 <sup>a</sup> , 0.523 <sup>b</sup> ,<br>0.928 <sup>c</sup> , 0.064 <sup>d</sup>  |
| Right eye: spherical power (D)<br>[n]          | -0.750<br>(-2 – 0.250)<br>[2486] | -0.500<br>(-1.500 – 0.370)<br>[649] | -0.750<br>(-2 – 0.185)<br>[273] | -0.750<br>(-2.250 – 0.563)<br>[106] | -0.750<br>(-1.840 – 0.188)<br>[40] | <0.001 <sup>a</sup> , 0.434 <sup>b</sup> ,<br>0.839 <sup>c</sup> , 0.188 <sup>d</sup> |
| Right eye: anterior chamber angle (°)<br>[n]   | 87.7 ± 56.9<br>[2140]            | 87.7 ± 58.7<br>[554]                | 93.2 ± 54.8<br>[252]            | 86 ± 56.1<br>[93]                   | 89.8 ± 57.1<br>[33]                | 0.997 <sup>a</sup> , 0.146 <sup>b</sup> ,<br>0.778 <sup>c</sup> , 0.835 <sup>d</sup>  |
| Right eye: anterior chamber depth (mm)<br>[n]  | 3.0 ± 0.4<br>[2514]              | 2.9 ± 0.4<br>[653]                  | 2.9 ± 0.4<br>[270]              | 2.9 ± 0.3<br>[107]                  | 2.8 ± 0.3<br>[39]                  | 0.804 <sup>a</sup> , 0.775 <sup>b</sup> ,<br>0.046 <sup>c</sup> , 0.016 <sup>d</sup>  |
| Right eye: corneal radius (mm)<br>[n]          | 7.8 ± 0.3<br>[1374]              | 7.8 ± 0.3<br>[397]                  | 7.8 ± 0.3<br>[158]              | 7.7 ± 0.2<br>[50]                   | 7.7 ± 0.2<br>[15]                  | 0.155 <sup>a</sup> , 0.608 <sup>b</sup> ,<br>0.803 <sup>c</sup> , 0.054 <sup>d</sup>  |
| Left eye: posterior chamber length (mm)<br>[n] | 15.9 ± 1.2<br>[2503]             | 15.8 ± 1.0<br>[651]                 | 15.8 ± 1.0<br>[271]             | 15.7 ± 1.1<br>[107]                 | 15.9 ± 1.5<br>[39]                 | 0.285 <sup>a</sup> , 0.540 <sup>b</sup> ,<br>0.079 <sup>c</sup> , 0.845 <sup>d</sup>  |

|                                              |                                  |                                     |                                 |                                 |                                     |                                                                                       |
|----------------------------------------------|----------------------------------|-------------------------------------|---------------------------------|---------------------------------|-------------------------------------|---------------------------------------------------------------------------------------|
| Left eye: axial length (mm)<br>[n]           | 23.1<br>(22.4 – 23.7)<br>[2508]  | 23<br>(22.4 – 23.6)<br>[653]        | 23<br>(22.5 – 23.8)<br>[271]    | 23<br>(22.3 – 23.7)<br>[107]    | 23.2<br>(22.6 – 24.3)<br>[39]       | 0.418 <sup>a</sup> , 0.264 <sup>b</sup> ,<br>0.297 <sup>c</sup> , 0.9335 <sup>d</sup> |
| Left eye: IOL (D)<br>[n]                     | 21.5<br>(19.8 – 23.2)<br>[2483]  | 21.8<br>(20.2 – 23.1)<br>[650]      | 21.5<br>(19.9 – 22.8)<br>[270]  | 22.3<br>(20.3 – 23.8)<br>[106]  | 21.1<br>(19.5 – 22.9)<br>[37]       | 0.755 <sup>a</sup> , 0.704 <sup>b</sup> ,<br>0.007 <sup>c</sup> , 0.658 <sup>d</sup>  |
| Left eye: corneal thickness (μm)<br>[n]      | 560 ± 36.2<br>[2496]             | 561 ± 36.1<br>[652]                 | 560 ± 37<br>[269]               | 556.8 ± 38.8<br>[107]           | 575 ± 41.1<br>[39]                  | 0.524 <sup>a</sup> , 0.982 <sup>b</sup> ,<br>0.371 <sup>c</sup> , 0.010 <sup>d</sup>  |
| Left eye: lens thickness (mm)<br>[n]         | 4.4 ± 0.4<br>[2491]              | 4.3 ± 0.4<br>[651]                  | 4.3 ± 0.5<br>[270]              | 4.4 ± 0.4<br>[106]              | 4.3 ± 0.5<br>[37]                   | 0.404 <sup>a</sup> , 0.712 <sup>b</sup> ,<br>0.419 <sup>c</sup> , 0.648 <sup>d</sup>  |
| Left eye: cylinder power (°)<br>[n]          | -0.326 ± 1.329<br>[2486]         | -0.220 ± 1.126<br>[656]             | -0.352 ± 1.177<br>[275]         | -0.493 ± 1.753<br>[107]         | -0.381 ± 1.443<br>[40]              | 0.040 <sup>a</sup> , 0.755 <sup>b</sup> ,<br>0.334 <sup>c</sup> , 0.795 <sup>d</sup>  |
| Left eye: spherical power (D)<br>[n]         | -0.750<br>(-2 – 0.250)<br>[2486] | -0.500<br>(-1.500 – 0.370)<br>[656] | -0.750<br>(-2 – 0.120)<br>[275] | -0.500<br>(-2 – 0.500)<br>[107] | -1.000<br>(-2.625 – -0.063)<br>[40] | 0.001 <sup>a</sup> , 0.722 <sup>b</sup> ,<br>0.363 <sup>c</sup> , 0.155 <sup>d</sup>  |
| Left eye: anterior chamber angle (°)<br>[n]  | 87.7 ± 58.6<br>[2136]            | 88.0 ± 59.3<br>[556]                | 87.1 ± 58.8<br>[253]            | 99.2 ± 57.7<br>[92]             | 81.4 ± 60.6<br>[33]                 | 0.930 <sup>a</sup> , 0.884 <sup>b</sup> ,<br>0.066 <sup>c</sup> , 0.538 <sup>d</sup>  |
| Left eye: anterior chamber depth (mm)<br>[n] | 3.0 ± 0.5<br>[2508]              | 3.0 ± 0.4<br>[653]                  | 3.0 ± 0.5<br>[271]              | 2.9 ± 0.5<br>[107]              | 2.9 ± 0.4<br>[39]                   | 0.483 <sup>a</sup> , 0.211 <sup>b</sup> ,<br>0.437 <sup>c</sup> , 0.490 <sup>d</sup>  |
| Left eye: corneal radius (mm)<br>[n]         | 7.8<br>(7.6 – 8.0)<br>[1378]     | 7.8<br>(7.6 – 7.9)<br>[397]         | 7.8<br>(7.6 – 8.0)<br>[160]     | 7.7<br>(7.6 – 8.0)<br>[53]      | 7.7<br>(7.6 – 7.8)<br>[15]          | 0.140 <sup>a</sup> , 0.931 <sup>b</sup> ,<br>0.431 <sup>c</sup> , 0.649 <sup>d</sup>  |

Data are presented as Mean ± SD or Median (25-75th percentile). Number of participants is given in the square brackets [n]. P-value denotes the p-value of a t-test for the comparison of each thyroid function group with the euthyroid group. <sup>a</sup>p-value for the Euthyroid with positive antibodies, <sup>b</sup>p-value for the Subclinical hypothyroid, <sup>c</sup>p-value for the Clinical hypothyroid, <sup>d</sup>p-value for the Subclinical and clinical hyperthyroid group. fT3, free triiodothyronine; fT4, free thyroxine; IOL, intraocular lens power; n, number of participants; Tg, thyroglobulin; TgAb, thyroglobulin antibodies; TPOAb, thyroid peroxidase antibodies; TSH, thyroid-stimulating hormone.
